# Supplementary material for: L1198F Mutation Resensitizes Crizotinib to ALK by Altering the Conformation of Inhibitor and ATP Binding Sites
Source: MDPI journal article supplement (doi:10.3390/ijms18030482), 2017-02-24
Supplement: s1 [file s1]

## Supplementary Materials: L1198F Mutation Resensitizes Crizotinib to ALK by Altering the Conformation of Inhibitor and ATP Binding Sites

Jian Li, Rong Sun, Yuehong Wu, Mingzhu Song, Jia Li, Qianye Yang, Xiaoyi Chen, Jinku Bao and Qi Zhao

**Table S1.** Predicted binding energy of anaplastic lymphoma kinase (ALK)–crizotinib and ALK–lorlatinib complexes.

| PDB ID                                  | Mutation         | Inhibitor  | Ki    | IC <sub>50</sub> | AUTODOCK<br>(kJ/mol) | Hawkins_GB/SA<br>(kJ/mol) | MM/PBSA<br>(kJ/mol) |
|-----------------------------------------|------------------|------------|-------|------------------|----------------------|---------------------------|---------------------|
| 5AA8                                    | C1156Y<br>L1198F | Lorlatinib | 61    | 67               | 123.7                | −77.44                    | −26.66              |
| 5AAB                                    | C1156Y<br>L1198F | Crizotinib | 0.6   | 0.6              | 25.9                 | −472.74                   | −231.88             |
| Folds of change (crizotinib/lorlatinib) | C1156Y<br>L1198F | -          | 111.7 | 111.7            | 4.8                  | 6.1                       | 8.7                 |

GB/SA: Generalized Born surface area; MM/PBSA: Molecular mechanics Poisson–Boltzmann surface area; PDB: Protein Data Bank.

**Table S3.** Key amino acid residues contributing to the electrostatic energy.

| Position | PDB ID | Electrostatic Energy (kcal/mol) |          |          | Folds of Change |          |          | Average |
|----------|--------|---------------------------------|----------|----------|-----------------|----------|----------|---------|
|          |        | 5–10 ns                         | 20–25 ns | 25–30 ns | 5–10 ns         | 20–25 ns | 25–30 ns |         |
| 1124     | 5AA8   | −10.74                          | −10.98   | −10.90   | −10.90          | 6.73     | 5.74     | 5.60    |
|          | 5AAb   | −46.58                          | −73.95   | −62.56   |                 |          |          |         |
| 1150     | 5AA8   | −79.38                          | −69.78   | −72.11   | 1.24            | 1.08     | 1.09     | 1.14    |
|          | 5AAb   | −64.01                          | −64.55   | −66.09   |                 |          |          |         |
| 1119     | 5AA8   | −7.22                           | −8.98    | −8.61    | 1.26            | 1.07     | 1.07     | 1.14    |
|          | 5AAb   | −9.1                            | −9.63    | −9.25    |                 |          |          |         |
| 1203     | 5AA8   | −1.67                           | −5.4     | −2.28    | 11.63           | 3.68     | 8.28     | 7.86    |
|          | 5AAb   | −19.42                          | −19.88   | −18.87   |                 |          |          |         |
| 1210     | 5AA8   | 4.65                            | 13.43    | 16.47    | 2.74            | 3.82     | 24.58    | 8.55    |
|          | 5AAb   | −12.73                          | 3.52     | 0.67     |                 |          |          |         |

**Table S4.** Trends of root-mean-square fluctuation (RMSF) change of the key amino acid residues in ALK.

| Position | PDB ID | RMSF (nm) |          |          | Interval Coefficient |                   | RMSF Coefficient | Relative Folds of Change |          |          | Average |
|----------|--------|-----------|----------|----------|----------------------|-------------------|------------------|--------------------------|----------|----------|---------|
|          |        | 5–10 ns   | 20–25 ns | 25–30 ns | 5-10 ns/20–25 ns     | 20–25 ns/25–30 ns |                  | 5–10 ns                  | 20–25 ns | 25–30 ns |         |
| 1270     | 5AA8   | 0.0413    | 0.0365   | 0.036    | −1                   | 1                 | 0                |                          |          |          |         |
|          | 5AAB   | 0.0401    | 0.0376   | 0.0397   |                      |                   |                  |                          |          |          |         |
| 1124     | 5AA8   | 0.1004    | 0.102    | 0.0985   | 1                    | 1                 | 2                | 1.53                     | 2.34     | 1.53     | 1.80    |
|          | 5AAB   | 0.1538    | 0.2382   | 0.1511   |                      |                   |                  |                          |          |          |         |
| 1150     | 5AA8   | 0.0496    | 0.0496   | 0.0461   | 1                    | −1                | −2               |                          |          |          |         |
|          | 5AAB   | 0.0483    | 0.0462   | 0.051    |                      |                   |                  |                          |          |          |         |
| 1119     | 5AA8   | 0.0512    | 0.0455   | 0.0548   | −1                   | −1                | 0                |                          |          |          |         |
|          | 5AAB   | 0.0501    | 0.0591   | 0.0414   |                      |                   |                  |                          |          |          |         |
| 1203     | 5AA8   | 0.0405    | 0.042    | 0.0448   | 1                    | −1                | 2                |                          |          |          |         |
|          | 5AAB   | 0.0462    | 0.0537   | 0.0422   |                      |                   |                  |                          |          |          |         |
| 1210     | 5AA8   | 0.0652    | 0.0612   | 0.0544   | 1                    | 1                 | 0                | 1.04                     | 1.67     | 1.16     | 1.29    |
|          | 5AAB   | 0.0678    | 0.1023   | 0.063    |                      |                   |                  |                          |          |          |         |
| 1249     | 5AA8   | 0.0412    | 0.0393   | 0.0367   | −1                   | 1                 | 0                |                          |          |          |         |
|          | 5AAB   | 0.0366    | 0.0433   | 0.0384   |                      |                   |                  |                          |          |          |         |
| 1278     | 5AA8   | 0.0812    | 0.0739   | 0.0781   | −1                   | 1                 | 0                |                          |          |          |         |
|          | 5AAB   | 0.0773    | 0.1089   | 0.088    |                      |                   |                  |                          |          |          |         |
| 1279     | 5AA8   | 0.1008    | 0.098    | 0.0845   | −1                   | 1                 | 0                |                          |          |          |         |
|          | 5AAB   | 0.0915    | 0.1336   | 0.113    |                      |                   |                  |                          |          |          |         |
